# Supplementary material for: Increased Ectodomain Shedding of Cell Adhesion Molecule 1 from Pancreatic Islets in Type 2 Diabetic Pancreata: Correlation with Hemoglobin A1c Levels
Source: PubMed Central journal article supplement (PMC4071031; doi:10.1371/journal.pone.0100988), 2014-06-25

CADM1 shedding rate  
(CTFs/Full-length)

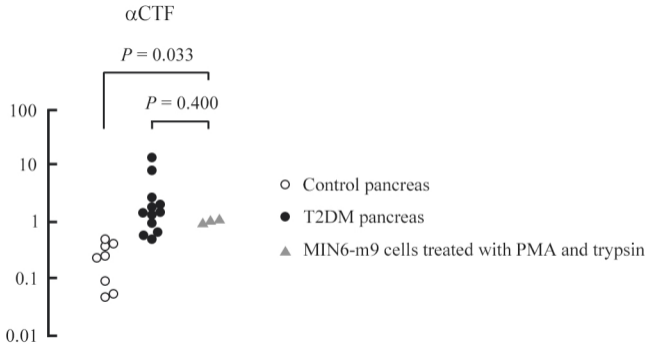

Supplement: pone.0100988.s003.pdf [file pone.0100988.s003.pdf]
